# Supplementary material for: Ten Thousand-Fold Higher than Acceptable Bacterial Loads Detected in Kenyan Hospital Environments: Targeted Approaches to Reduce Contamination Levels
Source: Int J Environ Res Public Health. 2021 Jun 25;18(13):6810. doi: 10.3390/ijerph18136810 (PMC8297338; doi:10.3390/ijerph18136810)
Supplement: Supplementary file 1 [file ijerph-18-06810-s001.zip › ijerph-1254105-supplementary.pdf]

**Supplementary Table S1: Number and types of high touch surfaces or items sampled in the study (N =559).**

| <b>Patient and clinical areas</b>     | <b>No. of<br/>sampled<br/>items</b> | <b>Equipment</b>                      | <b>No. of<br/>sampled<br/>items</b> | <b>Bathroom Areas</b> | <b>No. of<br/>sampled<br/>items</b> |
|---------------------------------------|-------------------------------------|---------------------------------------|-------------------------------------|-----------------------|-------------------------------------|
| Patient beds                          | 92                                  | Intravenous pole handles and tubing   | 68                                  | Bathroom sinks        | 12                                  |
| Bed rails                             | 79                                  | Baby weighing scales                  | 13                                  | Toilet handrails      | 4                                   |
| Room inner doorknobs                  | 45                                  | Computer keyboards                    | 6                                   | Toilet flush handles  | 4                                   |
| Room sinks                            | 44                                  | Telephone dial pad                    | 8                                   | Toilet flush buttons  | 2                                   |
| Newborn incubators                    | 25                                  | Oxygen concentrator dial pads         | 4                                   | Saline bath tub       | 2                                   |
| Tray table tops                       | 23                                  | Computer mouse                        | 4                                   |                       |                                     |
| Room light switch plates              | 21                                  | Blood pressure cuffs                  | 4                                   |                       |                                     |
| Bedside table tops                    | 13                                  | Thermometers                          | 2                                   |                       |                                     |
| Patient chairs - arms                 | 12                                  | Baby height meters                    | 2                                   |                       |                                     |
| Baby cots                             | 10                                  | Adult weighing scale pole handles     | 2                                   |                       |                                     |
| Clinicians laboratory coats           | 8                                   | Manual vacuum aspiration patient beds | 1                                   |                       |                                     |
| Clinicians desks                      | 7                                   | IV tubing                             | 2                                   |                       |                                     |
| Patient record holders                | 4                                   | Fridge door handles                   | 2                                   |                       |                                     |
| Operation gowns – midsections & cuffs | 4                                   | Equipment Control panels              | 2                                   |                       |                                     |
| Cupboard handles                      | 4                                   | Clinician mobile phones               | 2                                   |                       |                                     |
| Trolley handles                       | 2                                   | Call system dial pad                  | 2                                   |                       |                                     |
| Stretcher                             | 2                                   | Suction tubes                         | 2                                   |                       |                                     |
| Patient examination beds              | 2                                   | Stethoscope                           | 2                                   |                       |                                     |
| Operation table handles               | 2                                   | Oxygen tubes                          | 2                                   |                       |                                     |
| Operation tables                      | 2                                   |                                       |                                     |                       |                                     |
| Breast feeding chairs                 | 2                                   |                                       |                                     |                       |                                     |
| Bed screeners                         | 2                                   |                                       |                                     |                       |                                     |
| <b>Total</b>                          | <b>405/559</b>                      |                                       | <b>130/559</b>                      |                       | <b>24/559</b>                       |
